# Supplementary material for: Sensory neuropathy hampers nociception-mediated bone marrow stem cell release in mice and patients with diabetes
Source: PubMed Central journal article supplement (PMC4589553; doi:10.1007/s00125-015-3735-0), 2015-09-10
Supplement: 125_2015_3735_MOESM2_ESM.pdf [file 125_2015_3735_MOESM2_ESM.pdf]

**ESM Tab. 1: Clinical Study 1, an observational study with the main objective of assessing the association between diabetes mellitus and nerve rarefaction in the bone marrow.**

|                                      | <b>Controls<br/>(N=49)</b> | <b>Diabetics<br/>(N=94)</b> | <b>p-value</b> |
|--------------------------------------|----------------------------|-----------------------------|----------------|
| Age (years)                          | 68.0±11.1                  | 63.8±8.8                    | 0.014          |
| Sex (males) (n,%) <sup>*</sup>       | 29 (59)                    | 76 (81)                     | 0.005          |
| Body Mass Index (kg/m <sup>2</sup> ) | 26.4±3.0                   | 30.4±5.5                    | <0.001         |
| Fasting glucose (mmol/l)             | 4.9±0.5                    | 8.4±2.9                     | <0.001         |
| HbA1c (%)<br>(mmol/mol)              | 4.9±0.5<br>(30±5.5)        | 7.8±1.7<br>(62±18.6)        | <0.001         |

Data are presented as mean±SD. <sup>\*</sup>(n,%) number and percentage of males.
