# Supplementary material for: Sensory neuropathy hampers nociception-mediated bone marrow stem cell release in mice and patients with diabetes
Source: PubMed Central journal article supplement (PMC4589553; doi:10.1007/s00125-015-3735-0), 2015-09-10
Supplement: 125_2015_3735_MOESM3_ESM.pdf [file 125_2015_3735_MOESM3_ESM.pdf]

**ESM Tab. 2. Clinical Study 1, details of type 2 diabetics subgroups**

|                                       | <b>T2DM-N</b><br><b>(N=39)</b> | <b>T2DM-NI</b><br><b>(N=39)</b> | <b>T2DM-U</b><br><b>(N=16)</b> | <b>p-value</b> |
|---------------------------------------|--------------------------------|---------------------------------|--------------------------------|----------------|
| Age (years)*                          | 60.4 ± 7.9                     | 68.3 ± 7.1                      | 61.1 ± 10.0                    | <0.001         |
| Gender (males)*                       | 30(77)                         | 34(87)                          | 12(75)                         | 0.417          |
| Smoking (n, %)**                      | 0(0)                           | 1(3)                            | 1(6)                           | 0.335          |
| Hypertension (n, %)**                 | 35(90)                         | 39(100)                         | 4(25)                          | <0.001         |
| Body Mass Index (kg/m <sup>2</sup> )* | 30.6 ± 5.8                     | 29.9 ± 5.1                      | 30.7 ± 5.9                     | 0.837          |
| Duration of diabetes (years)*         | 12.3±12.5                      | 15.9±9.9                        | 7.4±9.5                        | 0.009          |
| <b>Laboratory test*</b>               |                                |                                 |                                |                |
| HbA <sub>1c</sub> (%)<br>(mmol/mol)   | 8.1±1.8<br>(65±19.7)           | 7.9±1.7<br>(63±18.6)            | 6.8±1.2<br>(51±13.1)           | 0.039          |
| Fasting glucose (mmol/l)              | 8.7±2.8                        | 8.2±2.9                         | 7.9±3.2                        | 0.485          |
| Creatinine (µmol/l)                   | 96.8±61.6                      | 114.4±44                        | 70.4±17.6                      | <0.001         |
| Total cholesterol (mmol/l)            | 4.45±1.13                      | 4.29± 1.07                      | 4.3±1.05                       | 0.794          |
| LDL-cholesterol (mmol/l)              | 2.45±0.92                      | 2.39±1.03                       | 2.67±0.81                      | 0.707          |
| HDL-cholesterol (mmol/l)              | 1.44±0.56                      | 1.34±0.5                        | 1.27±0.57                      | 0.541          |
| Triglycerides (mmol/l)                | 1.28±0.51                      | 1.63± 0.72                      | 1.31± 0.71                     | 0.052          |
| <b>Medications**</b>                  |                                |                                 |                                |                |
| Insulin                               | 14(36)                         | 24(62)                          | 1(6)                           | 0.001          |
| Oral anti-diabetic drugs              | 4(10)                          | 1(3)                            | 12(75)                         | <0.001         |
| Incretins                             | 4(10)                          | 0(0)                            | 0(0)                           | 0.053          |
| Statins                               | 19(49)                         | 27(69)                          | 8(50)                          | 0.150          |
| Anti-platelet therapy                 | 17(44)                         | 39(100)                         | 6(38)                          | <0.001         |

| <b>Complications**</b> |        |        |      |        |
|------------------------|--------|--------|------|--------|
| Retinopathy            | 19(53) | 29(83) | 0(0) | <0.001 |
| Non recent MI/ictus    | 13(33) | 29(76) | 1(6) | <0.001 |
| Nephropathy            | 20(54) | 37(95) | 0(0) | <0.001 |

Distribution of clinical variables, laboratory tests, therapies and complications in type 2 diabetic patients affected by peripheral neuropathy (T2DM-N), or peripheral neuropathy and CLI (T2DM-NI) and uncomplicated patients (T2DM-U) enrolled in Study 1.

\*Data presented as mean±SD; \*\*Data presented as number and percentage.
