# Supplementary material for: Sensory neuropathy hampers nociception-mediated bone marrow stem cell release in mice and patients with diabetes
Source: PubMed Central journal article supplement (PMC4589553; doi:10.1007/s00125-015-3735-0), 2015-09-10
Supplement: 125_2015_3735_MOESM4_ESM.pdf [file 125_2015_3735_MOESM4_ESM.pdf]

**ESM Tab. 3: Study 2 assessing the expression of the SP receptor NK1R on circulating CD34<sup>+</sup> progenitor cells**

| <b>Parameter</b>                    | <b>Non diabetic controls</b> | <b>Diabetic patients</b> | <b>p-value</b> |
|-------------------------------------|------------------------------|--------------------------|----------------|
| Number                              | 24                           | 74                       | -              |
| Age, years                          | 64.3±8.8                     | 62.7±9.8                 | 0.494          |
| Sex male, %                         | 47.8                         | 65.7                     | 0.126          |
| BMI, kg/m <sup>2</sup>              | 26.0±3.7                     | 28.0±4.0                 | 0.030          |
| HbA <sub>1c</sub> , %<br>(mmol/mol) | 5.4±0.4<br>(36±4.4)          | 7.2±1.1<br>(55±12.0)     | <0.001         |
| Diabetes duration, years            | -                            | 9.0±8.0                  | -              |
| Hypertension, %                     | 34.8                         | 50.7                     | 0.186          |
| Smoking, %                          | 10.0                         | 13.2                     | 0.704          |
| <b>Complications</b>                |                              |                          |                |
| Diabetic retinopathy, %             | -                            | 25.3                     | -              |
| Albuminuria, mg/g                   | 9.2±2.8                      | 34.0±70.1                | 0.096          |
| Diabetic neuropathy, %              | -                            | 19.2                     | -              |
| Macrovascular disease, %            | 0.0                          | 56.7                     | <0.001         |
| <b>Medications</b>                  |                              |                          |                |

|                                  |      |      |        |
|----------------------------------|------|------|--------|
| Insulin, %                       | -    | 30.1 | -      |
| Incretins, %                     | -    | 16.4 | -      |
| Oral anti-diabetic drugs, %      | -    | 67.5 | -      |
| Statins, %                       | 30.4 | 75.3 | <0.001 |
| ACE inhibitors, %                | 34.8 | 72.6 | 0.001  |
| Other anti-hypertensive drugs, % | 13.0 | 36.9 | 0.031  |
| Anti-platelet therapy, %         | 13.0 | 39.7 | 0.017  |

Distribution of clinical variables, laboratory tests, complications and therapies in non diabetic controls and type 2 diabetic patients enrolled in Study 2.
