# Supplementary material for: Sensory neuropathy hampers nociception-mediated bone marrow stem cell release in mice and patients with diabetes
Source: PubMed Central journal article supplement (PMC4589553; doi:10.1007/s00125-015-3735-0), 2015-09-10
Supplement: 125_2015_3735_MOESM5_ESM.pdf [file 125_2015_3735_MOESM5_ESM.pdf]

**ESM Tab. 4: Study 4 assessing the CD34<sup>+</sup> cell mobilization response to low-dose human recombinant G-CSF**

| Parameter                           | All patients         |                      |       | Non diabetic patients |           |       | Diabetic patients    |                      |       |
|-------------------------------------|----------------------|----------------------|-------|-----------------------|-----------|-------|----------------------|----------------------|-------|
|                                     | No pain              | Pain                 | p     | No pain               | Pain      | p     | No pain              | Pain                 | p     |
| Diabetes, %                         | 71.9                 | 54.5                 | 0.301 | 0.0                   | 0.0       | -     | 100.0                | 100.0                | -     |
| Age, years                          | 48.0±8.5             | 39.5±11.9            | 0.071 | 45.8±15.3             | 30.0±13.4 | 0.042 | 48.9±10.2            | 47.3±19.3            | 0.794 |
| Sex male, %                         | 84.0                 | 73.0                 | 0.404 | 89.0                  | 60.0      | 0.238 | 83.0                 | 83.0                 | 0.968 |
| BMI, kg/m <sup>2</sup>              | 28.0±5.0             | 26.3±7.9             | 0.451 | 26.7±9.5              | 24.2±10.8 | 0.359 | 28.4±5.9             | 28.1±11.5            | 0.914 |
| HbA <sub>1c</sub> , %<br>(mmol/mol) | 8.1±1.7<br>(65±18.6) | 7.5±3.0<br>(58±32.8) | 0.271 | -                     | -         | -     | 8.1±1.7<br>(65±18.6) | 7.5±3.0<br>(58±32.8) | 0.271 |
| Diabetes duration, years            | 15.9±3.3             | 13.8±5.7             | 0.674 | -                     | -         | -     | 15.9±3.3             | 13.8±5.7             | 0.674 |
| Hypertension, %                     | 53.0                 | 27.0                 | 0.145 | 22.0                  | 0.0       | 0.290 | 65.0                 | 50.0                 | 0.511 |
| <b>Complications</b>                |                      |                      |       |                       |           |       |                      |                      |       |
| Diabetic retinopathy, %             | 18.8                 | 18.2                 | 0.967 | -                     | -         | -     | 26.0                 | 33.3                 | 0.734 |
| Microalbuminuria, %                 | 9.4                  | 0.0                  | 0.303 | 0.0                   | 0.0       | -     | 13.0                 | 0.0                  | 0.368 |
| Diabetic neuropathy, %              | 21.9                 | 9.1                  | 0.359 | -                     | -         | -     | 30.4                 | 16.7                 | 0.518 |
| Macrovascular disease, %            | 25.0                 | 9.0                  | 0.274 | 0.0                   | 0.0       | -     | 34.7                 | 16.7                 | 0.411 |

| <b>Medications</b>              |      |      |       |      |     |       |      |      |       |
|---------------------------------|------|------|-------|------|-----|-------|------|------|-------|
| Insulin, %                      | 59.0 | 45.0 | 0.435 | -    | -   | -     | 82.6 | 83.3 | 0.968 |
| Incretin, %                     | 9.0  | 9.0  | 1.000 | -    | -   | -     | 13.0 | 16.7 | 0.826 |
| Oral antidiabetic agent, %      | 38.0 | 18.0 | 0.248 | -    | -   | -     | 52.2 | 33.3 |       |
| Statin, %                       | 38.0 | 27.0 | 0.550 | 0.0  | 0.0 | -     | 52.0 | 50.0 | 0.928 |
| ACE inhibitors, %               | 44.0 | 18.0 | 0.136 | 11.0 | 0.0 | 0.478 | 57.0 | 33.0 | 0.329 |
| Other Anti-hypertensive drug, % | 25.0 | 18.0 | 0.654 | 11.0 | 0.0 | 0.478 | 35.0 | 33.0 | 0.949 |
| Anti-platelet therapy, %        | 25.0 | 18.0 | 0.654 | 0.0  | 0.0 | -     | 35.0 | 33.0 | 0.949 |

Clinical characteristics, complications and therapy of DM patients in the clinical study 4. Data expressed as mean±SD.
