# Supplementary material for: Sensory neuropathy hampers nociception-mediated bone marrow stem cell release in mice and patients with diabetes
Source: PubMed Central journal article supplement (PMC4589553; doi:10.1007/s00125-015-3735-0), 2015-09-10
Supplement: 125_2015_3735_MOESM6_ESM.pdf [file 125_2015_3735_MOESM6_ESM.pdf]

**ESM Tab. 5: Antibodies used for immunostaining and flow cytometry.**

| <b>Antibody</b>                          | <b>Manufacturer</b> | <b>Code</b> | <b>IHC dilution</b> | <b>FACS dilution</b> | <b>Detection system</b>                                        | <b>IHC dilution</b> | <b>FACS dilution</b> |
|------------------------------------------|---------------------|-------------|---------------------|----------------------|----------------------------------------------------------------|---------------------|----------------------|
| Mouse Anti-PGP9.5 [31A3]                 | Abcam               | ab20559     | 1:500               |                      | Peroxidase/DAB and System AP                                   | -                   |                      |
| Rat Anti-Substance P [M09205]            | Abcam               | ab7340      | 1:100               |                      | Alexa Fluor 555                                                | 1:200               |                      |
| Rabbit Anti-Substance P                  | Novus Biologicals   | NBP1-78326  | 1:200               |                      | Peroxidase/DAB                                                 | -                   |                      |
| Mouse Anti-Tyrosine Hydroxylase [779427] | R&D systems         | MAB7566     | 1:20                |                      | Peroxidase/DAB                                                 | -                   |                      |
| Mouse Anti-Human CD68 [PG-M1]            | Dako                | M0876       | 1:100               |                      | Peroxidase/DAB                                                 | -                   |                      |
| Mouse Anti-Human CD34 [QBEnd10]          | Dako                | M7165       | 1:50                |                      | Alexa Fluor 555                                                | 1:20                |                      |
| Rabbit Anti-NK1 receptor                 | Novus Biologicals   | NB300-119B  | 1:50                |                      | Streptavidin Alexa Fluor 488                                   | 1:200               |                      |
| Rabbit Anti-NK1 receptor - FITC          | Novus Biologicals   | NB300-119G  |                     | 1:30                 |                                                                |                     |                      |
| Mouse Anti-Human CD34 - PE-Cy7 [MOPC-21] | BD Biosciences      | 348811      |                     | 1:20                 |                                                                |                     |                      |
| Mouse Anti-Human KDR - PE [89106]        | R&D Systems         | FAB357P     |                     | 1:20                 |                                                                |                     |                      |
| Rabbit Anti-PGP9.5                       | Millipore           | AB5925      | 1:500               |                      | Peroxidase/DAB or<br>TSA plus Fluorescein<br>kit(NEL741E001KT) | 1:50                |                      |
| Rabbit Anti-Substance P                  | Immunostar          | 22064       | 1:2500              |                      | Peroxidase/DAB or<br>TSA plus Fluorescein<br>kit(NEL741E001KT) | 1:50                |                      |

|                                                                                       |                |            |       |       |                               |       |  |
|---------------------------------------------------------------------------------------|----------------|------------|-------|-------|-------------------------------|-------|--|
| Rabbit Anti-NGF*                                                                      | Abcam          | Ab6199     | 1:500 |       | Peroxidase/DAB                | -     |  |
| Rabbit Anti-NK1                                                                       | Immunostar     | 20060      | 1:50  | 1:500 | Goat anti rabbit PE           | 1:300 |  |
| Rat Anti-mouse CD31 [MEC13.3]                                                         | BD Pharmingen  | 557355     | 1:100 |       | Goat anti rat Alexa Fluor 568 | 1:300 |  |
| Rat Anti-CD117 APC-eFluor 780                                                         | BD Biosciences | 47-1171-82 |       | 1:400 |                               |       |  |
| Rat Anti-Ly6-A/E(Sca-1) PerCP-Cy5.5                                                   | BD Biosciences | 45-5981-80 |       | 1:400 |                               |       |  |
| Mouse Anti- CD3e, CD11b, CD45R, Ly-6C/G,<br>TER119 (Lineage cocktail) Alexa Fluor 488 | Invitrogen     | MLM20      |       | 1:00  |                               |       |  |
| Isolectin B4 - Biotin                                                                 | Invitrogen     | 121414     | 1:100 |       | Streptavidin Alexa Fluor 568  | 1:200 |  |
