# Supplementary material for: Sensory neuropathy hampers nociception-mediated bone marrow stem cell release in mice and patients with diabetes
Source: PubMed Central journal article supplement (PMC4589553; doi:10.1007/s00125-015-3735-0), 2015-09-10
Supplement: 125_2015_3735_MOESM8_ESM.pdf [file 125_2015_3735_MOESM8_ESM.pdf]

# ESM Fig. 2

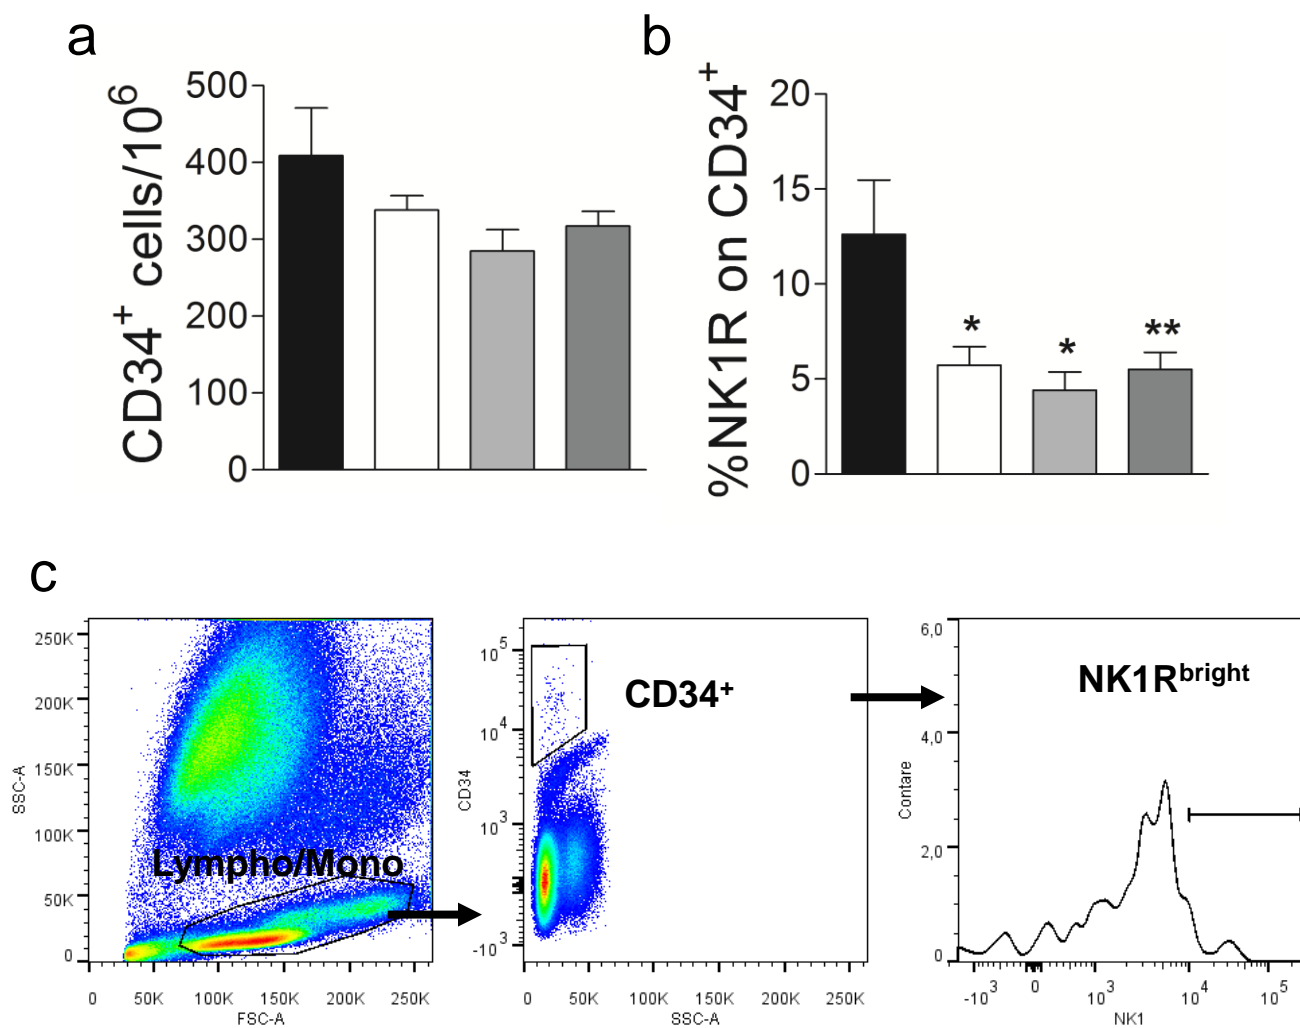

**ESM Figure 2: Reduced NK1R expression in stem cells of diabetic patients.** CD34<sup>+</sup> cell count (a), and the respective expression of the SP receptor NK1R (b) were quantified in non-diabetic (black) and type 2 diabetic patients divided according to complications (none, white; neuropathic, light grey; or neuroischaemic, dark grey, \**P*<0.05 vs. ND. Panel c shows a representative FACS plot to illustrate the gating strategy used to assess NK1R expression on CD34<sup>+</sup> cells.
