# Supplementary material for: Sensory neuropathy hampers nociception-mediated bone marrow stem cell release in mice and patients with diabetes
Source: PubMed Central journal article supplement (PMC4589553; doi:10.1007/s00125-015-3735-0), 2015-09-10
Supplement: 125_2015_3735_MOESM9_ESM.pdf [file 125_2015_3735_MOESM9_ESM.pdf]

### ESM Fig. 3

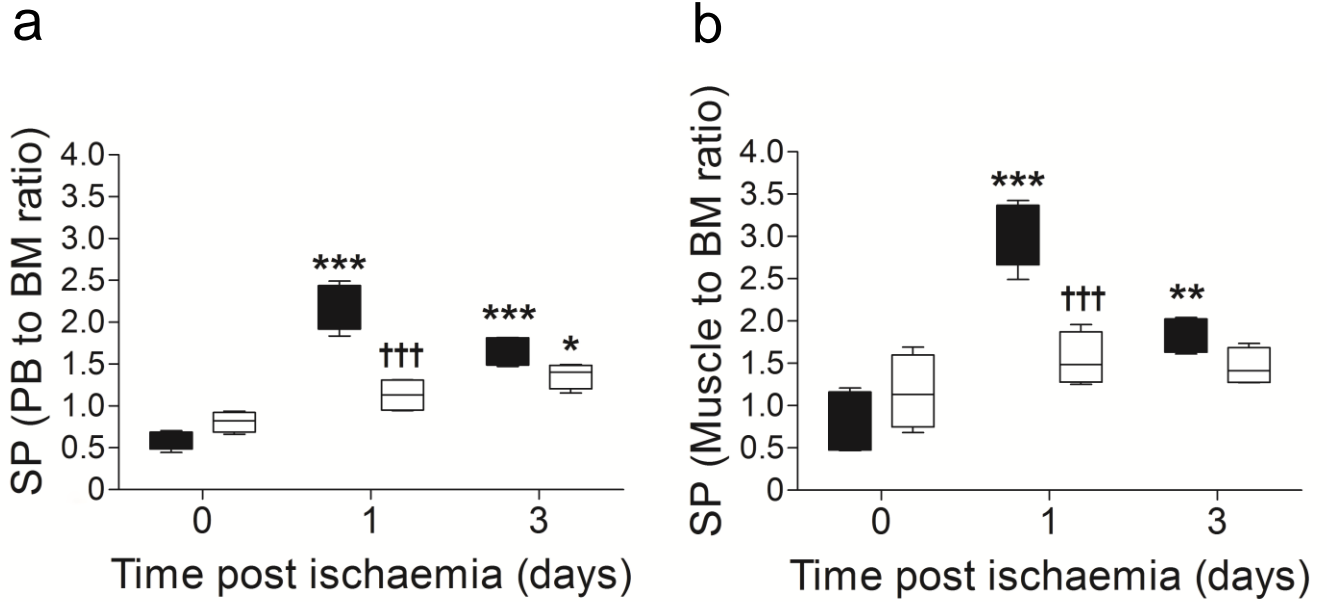

**ESM Figure 3: Diabetes alters the formation of a gradient of SP following ischaemia.** Bar graphs show the SP ratio between PB and BM (**a**) and ischaemic adductor muscle and BM (**b**). Black: non-diabetic, white: type 2 diabetic mice. \* $P < 0.05$ , \*\* $P < 0.01$  and \*\*\* $P < 0.001$  vs. time 0; ††† $P < 0.001$  vs. ND,  $n = 5$  per group.
