# Supplementary material for: Sensory neuropathy hampers nociception-mediated bone marrow stem cell release in mice and patients with diabetes
Source: PubMed Central journal article supplement (PMC4589553; doi:10.1007/s00125-015-3735-0), 2015-09-10
Supplement: 125_2015_3735_MOESM10_ESM.pdf [file 125_2015_3735_MOESM10_ESM.pdf]

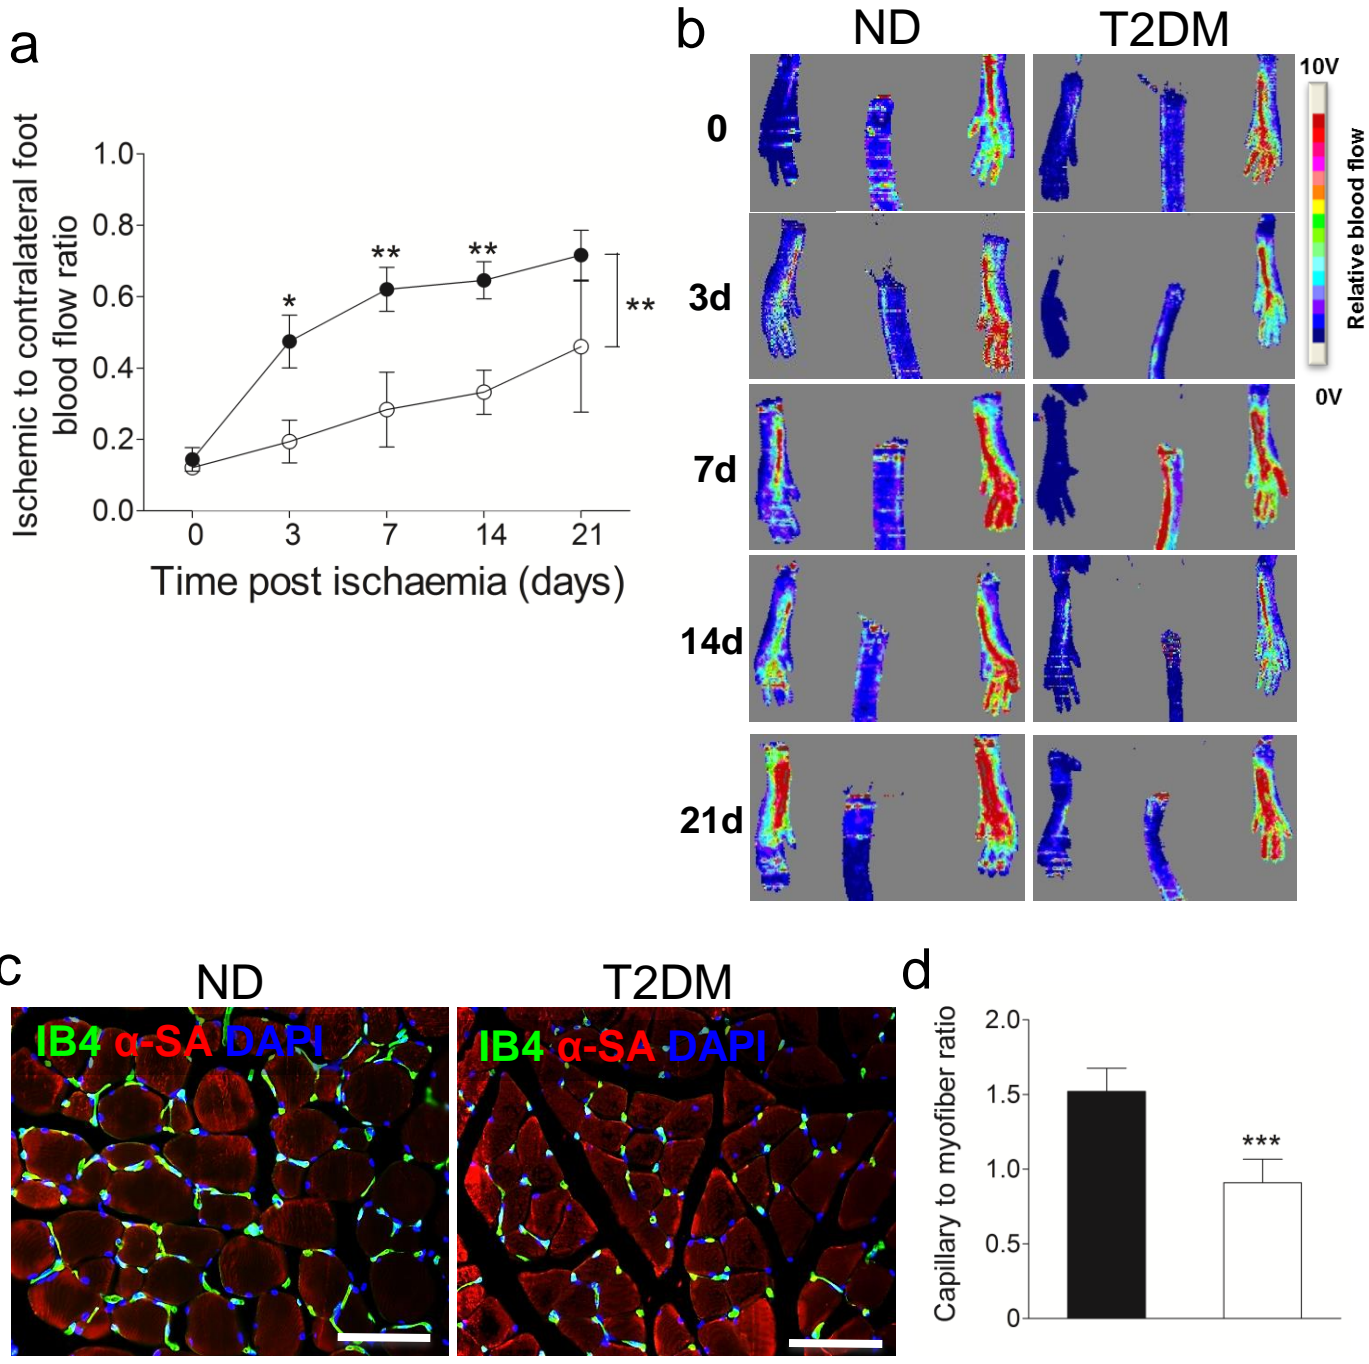

**ESM Figure 4: : Impaired nociceptive mechanism is associated with delayed perfusion recovery, impaired angiogenesis in type 2 diabetic mice submitted to unilateral limb ischaemia.** (a) Line graph show the reduced blood flow recovery of type 2 diabetic mice following induction of limb ischaemia. Black: non-diabetic, white: type 2 diabetic mice. (b) Representative images of blood flow assessed by laser Doppler flowmetry. (c) Representative images of capillaries in ischemic muscles. Isolectin B4 (IB4),  $\alpha$ -Sarcomeric Actin ( $\alpha$ -SA) (scale bar 50 $\mu$ m). (d) Reduced capillary density (means and SE) in ischemic muscles of type 2 diabetic mice. Black: non-diabetic, white: type 2 diabetic mice. \* $P < 0.05$ , \*\* $P < 0.01$  and \*\*\* $P < 0.001$  vs. ND,  $n = 5$  per group.
